# Supplementary material
Source: Springer Nature journal article supplement (https://www.springermedizin.de/resource/supplementary/12974_2008_134_MOESM1_ESM.pdf/9600846)

COX-2<sup>+/+</sup>

COX-2<sup>-/-</sup>

Vehicle

LPS

Vehicle

LPS

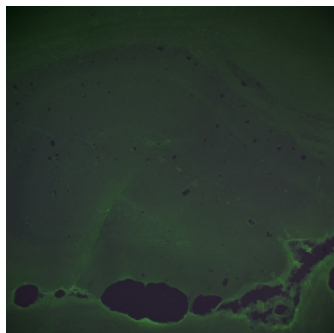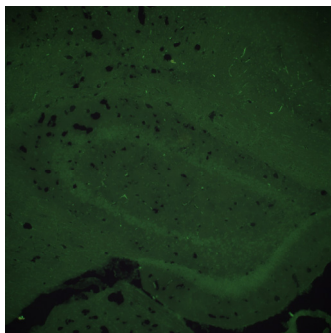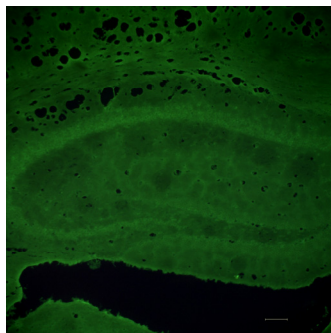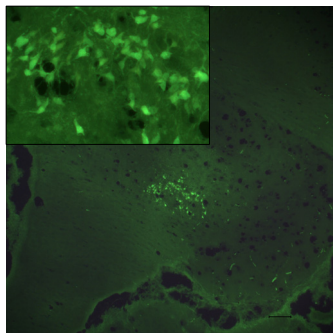

Supplement: MOESM1 [file 9600846]
